# Supplementary material for: Testing the Contribution of Multi-Source Remote Sensing Features for Random Forest Classification of the Greater Amanzule Tropical Peatland
Source: MDPI journal article supplement (doi:10.3390/s21103399), 2021-05-13
Supplement: s1 [file s1]

Supplementary materials: Testing the contribution of multi-source remote sensing features for random forest classification of the Greater Amanzule tropical peatland  
Alex O. Amoakoh, Paul Aplin, Kwame T. Awuah, Irene Delgado-Fernandez, Cherith Moses, Carolina Peña Alonso, Stephen Kankam and Justice C. Mensah

Table S1. Confusion matrix for land cover classification of S2 dataset (original Sentinel-2 image bands).

[illegible]

Table S2. Confusion matrix for land cover classification of S2+ dataset (original Sentinel-2 bands plus further spectral features – principally VIs – extracted from the Sentinel-2 bands).

[illegible]

Table S3. Confusion matrix for land cover classification of S1 dataset (original Sentinel-1 image bands).

|                          | <b>Mangrove</b> | <b>Mixed<br/>swamp</b> | <b>Palm<br/>swamp</b> | <b>Bog<br/>plain</b> | <b>Natural<br/>forest</b> | <b>Sparse<br/>vegetation</b> | <b>Coconut</b> | <b>Rubber</b> | <b>Oil<br/>palm</b> | <b>Built-<br/>up</b> | <b>Bare<br/>surface</b> | <b>Water</b> |
|--------------------------|-----------------|------------------------|-----------------------|----------------------|---------------------------|------------------------------|----------------|---------------|---------------------|----------------------|-------------------------|--------------|
| <b>Mangrove</b>          | 198             | 24                     | 9                     | 1                    | 20                        | 0                            | 12             | 1             | 0                   | 0                    | 0                       | 0            |
| <b>Mixed swamp</b>       | 38              | 434                    | 9                     | 0                    | 90                        | 0                            | 11             | 6             | 0                   | 1                    | 0                       | 0            |
| <b>Palm swamp</b>        | 5               | 4                      | 307                   | 0                    | 4                         | 0                            | 6              | 0             | 5                   | 3                    | 0                       | 0            |
| <b>Bog plain</b>         | 0               | 0                      | 0                     | 262                  | 3                         | 0                            | 0              | 0             | 0                   | 4                    | 0                       | 0            |
| <b>Natural forest</b>    | 0               | 8                      | 0                     | 1                    | 104                       | 0                            | 0              | 2             | 0                   | 0                    | 0                       | 0            |
| <b>Sparse vegetation</b> | 0               | 3                      | 0                     | 1                    | 140                       | 88                           | 1              | 5             | 0                   | 4                    | 0                       | 0            |
| <b>Coconut</b>           | 15              | 35                     | 16                    | 2                    | 68                        | 0                            | 132            | 4             | 3                   | 7                    | 0                       | 0            |
| <b>Rubber</b>            | 1               | 11                     | 0                     | 0                    | 70                        | 0                            | 1              | 145           | 0                   | 0                    | 0                       | 0            |
| <b>Oil palm</b>          | 0               | 0                      | 18                    | 0                    | 0                         | 0                            | 2              | 0             | 45                  | 5                    | 0                       | 0            |
| <b>Built-up</b>          | 10              | 8                      | 2                     | 31                   | 45                        | 1                            | 3              | 2             | 7                   | 150                  | 3                       | 0            |
| <b>Bare surface</b>      | 0               | 0                      | 0                     | 28                   | 7                         | 0                            | 0              | 1             | 0                   | 10                   | 127                     | 0            |
| <b>Water</b>             | 0               | 0                      | 0                     | 10                   | 0                         | 0                            | 0              | 0             | 0                   | 0                    | 0                       | 77           |

Table S4. Confusion matrix for land cover classification of S1+ dataset (original Sentinel-1 bands plus further texture and temporal features extracted from the Sentinel-1 bands).

|                              | <b>Mangrove</b> | <b>Mixed<br/>swamp</b> | <b>Palm<br/>swamp</b> | <b>Bog plain</b> | <b>Natural<br/>forest</b> | <b>Sparse<br/>vegetation</b> | <b>Coconut</b> | <b>Rubber</b> | <b>Oil<br/>palm</b> | <b>Built-up</b> | <b>Bare<br/>surface</b> | <b>Water</b> |
|------------------------------|-----------------|------------------------|-----------------------|------------------|---------------------------|------------------------------|----------------|---------------|---------------------|-----------------|-------------------------|--------------|
| <b>Mangrove</b>              | 192             | 34                     | 1                     | 0                | 28                        | 0                            | 3              | 1             | 0                   | 6               | 0                       | 0            |
| <b>Mixed swamp</b>           | 22              | 502                    | 4                     | 0                | 38                        | 0                            | 15             | 5             | 3                   | 0               | 0                       | 0            |
| <b>Palm swamp</b>            | 0               | 2                      | 320                   | 0                | 1                         | 0                            | 6              | 3             | 2                   | 0               | 0                       | 0            |
| <b>Bog plain</b>             | 0               | 1                      | 0                     | 263              | 1                         | 0                            | 0              | 2             | 0                   | 2               | 0                       | 0            |
| <b>Natural forest</b>        | 0               | 2                      | 0                     | 0                | 111                       | 0                            | 0              | 2             | 0                   | 0               | 0                       | 0            |
| <b>Sparse<br/>vegetation</b> | 1               | 15                     | 5                     | 5                | 43                        | 109                          | 2              | 57            | 5                   | 0               | 0                       | 0            |
| <b>Coconut</b>               | 8               | 54                     | 18                    | 2                | 21                        | 0                            | 144            | 26            | 3                   | 5               | 1                       | 0            |
| <b>Rubber</b>                | 3               | 26                     | 1                     | 0                | 21                        | 0                            | 2              | 174           | 0                   | 1               | 0                       | 0            |
| <b>Oil palm</b>              | 0               | 1                      | 9                     | 0                | 2                         | 0                            | 1              | 1             | 55                  | 1               | 0                       | 0            |
| <b>Built-up</b>              | 0               | 1                      | 0                     | 15               | 63                        | 0                            | 0              | 1             | 1                   | 176             | 4                       | 1            |
| <b>Bare surface</b>          | 0               | 0                      | 0                     | 16               | 2                         | 0                            | 0              | 0             | 0                   | 9               | 145                     | 1            |
| <b>Water</b>                 | 0               | 0                      | 0                     | 0                | 3                         | 0                            | 0              | 0             | 0                   | 0               | 0                       | 84           |

Table S5. Confusion matrix for land cover classification of S2+S1+ dataset (original Sentinel-2 and Sentinel-1 bands plus further features extracted from the Sentinel-2 and Sentinel-1 bands).

[illegible]

Table S6. Confusion matrix for land cover classification of S2+S1+DEM dataset (original Sentinel-2 and Sentinel-1 bands plus further features extracted from the Sentinel-2 and Sentinel-1 bands, plus STRM-derived elevation features).

[illegible]

Tables S7–11. Feature importance for discriminating various land cover types based on the different datasets: (a) S2 (original Sentinel-2 image bands), (b) S2+ (original Sentinel-2 bands plus further spectral features – principally VIs – extracted from the Sentinel-2 bands), (c) S1 (original Sentinel-1 image bands), (d) S1+ (original Sentinel-1 bands plus further texture and temporal features extracted from the Sentinel-1 bands), and (e) S2+S1+ (original Sentinel-2 and Sentinel-1 bands plus further features extracted from the Sentinel-2 and Sentinel-1 bands). The five most important features are denoted with the letters a, b, c, d and e respectively. (ARVI = atmospherically resistant vegetation index, EVI = enhanced vegetation index, GNDVI = green normalized difference vegetation index, LSWI = land surface water index, MSAVI2 = modified soil-adjusted vegetation index, NBR = normalized burn ratio, NBR2 = normalized burn ratio 2, NDVI = normalized difference vegetation index, NDWI = normalized difference water index, NIR = near infrared, stdDev = standard deviation, SWIR = shortwave infrared, S2REP = Sentinel-2 red edge position index, VH = Sentinel-1 vertical-horizontal cross polarization, VV = Sentinel-1 vertical-vertical co-polarization.)

Table S7. Feature importance for discriminating various land cover types based on the S2 dataset.

|                   | <b>Mangrove</b> | <b>Mixed<br/>swamp</b> | <b>Palm<br/>swamp</b> | <b>Bog plain</b> | <b>Natural<br/>forest</b> | <b>Sparse<br/>vegetation</b> | <b>Coconut</b> | <b>Rubber</b> | <b>Oil palm</b> | <b>Built-up</b> | <b>Bare<br/>surface</b> | <b>Water</b> |
|-------------------|-----------------|------------------------|-----------------------|------------------|---------------------------|------------------------------|----------------|---------------|-----------------|-----------------|-------------------------|--------------|
| <b>Blue</b>       | 0.0024          | 0.0015                 | 0.0153                | 0.0777           | 0.0305                    | 0.0113                       | 0.0077         | 0.0082        | 0.0138          | 0.2995e         | 0.2189                  | 0.0152       |
| <b>Green</b>      | 0.0499          | 0.0533e                | 0.0991d               | 0.1472d          | 0.0028                    | 0.0925                       | 0.0449         | 0.0304        | 0.0576          | 0.4022d         | 0.3949d                 | 0.0154       |
| <b>Red</b>        | 0.0271          | 0.0364                 | 0.0714                | 0.2943b          | 0.0246                    | 0.0868                       | 0.0298         | 0.0160        | 0.0403          | 0.7645a         | 1.1068a                 | 0.0899c      |
| <b>Red Edge 1</b> | 0.0552d         | 0.0507                 | 0.0824                | 0.1247e          | 0.0299                    | 0.0884                       | 0.0483         | 0.0402        | 0.0596          | 0.2194          | 0.34904                 | 0.0046       |
| <b>Red Edge 2</b> | 0.0386          | 0.0348                 | 0.0516                | 0.0337           | 0.0460                    | 0.0636                       | 0.0457         | 0.0532        | 0.0573          | 0.0363          | 0.0806                  | 0.0362       |
| <b>Red Edge 3</b> | 0.0571c         | 0.0556d                | 0.0785                | 0.0459           | 0.0836d                   | 0.1026e                      | 0.0776d        | 0.0907e       | 0.0977d         | 0.0435          | 0.1043                  | 0.0616       |
| <b>NIR</b>        | 0.0783b         | 0.0780c                | 0.1074c               | 0.0656           | 0.1170c                   | 0.1429d                      | 0.1071c        | 0.1238c       | 0.1340c         | 0.0584          | 0.1244                  | 0.0880d      |
| <b>Red Edge 4</b> | 0.0892a         | 0.0917b                | 0.1237b               | 0.0786           | 0.1335b                   | 0.1617c                      | 0.1237b        | 0.1417b       | 0.1533b         | 0.0679          | 0.1286                  | 0.1033b      |
| <b>SWIR1</b>      | 0.0508e         | 0.1000a                | 0.1908a               | 0.3159a          | 0.1478a                   | 0.2868a                      | 0.1345a        | 0.2147a       | 0.1859a         | 0.4884c         | 0.7082b                 | 0.1562a      |
| <b>SWIR2</b>      | 0.0079          | 0.0489                 | 0.0946e               | 0.2797c          | 0.0645e                   | 0.1776b                      | 0.0571e        | 0.1060d       | 0.0851e         | 0.6602b         | 0.6738c                 | 0.0860e      |

Table S8. Feature importance for discriminating various land cover types based on the S2+ dataset.

[illegible]

Table S9. Feature importance for discriminating various land cover types based on the S1 dataset.

|           | <b>Mangrove</b> | <b>Mixed<br/>swamp</b> | <b>Palm<br/>swamp</b> | <b>Bog plain</b> | <b>Natural<br/>forest</b> | <b>Sparse<br/>vegetation</b> | <b>Coconut</b> | <b>Rubber</b> | <b>Oil<br/>palm</b> | <b>Built-up</b> | <b>Bare<br/>surface</b> | <b>Water</b> |
|-----------|-----------------|------------------------|-----------------------|------------------|---------------------------|------------------------------|----------------|---------------|---------------------|-----------------|-------------------------|--------------|
| <b>VH</b> | 0.5737b         | 0.5775b                | 0.4974b               | 0.2387a          | 0.5504b                   | 0.5014b                      | 0.5265b        | 0.5259b       | 0.4619b             | 0.4497b         | 0.1222b                 | 0.2300b      |
| <b>VV</b> | 0.6865a         | 0.6534a                | 0.6091a               | 0.1091b          | 0.5991a                   | 0.5108a                      | 0.6050a        | 0.5456a       | 0.5762a             | 0.5243a         | 0.1354a                 | 0.4029a      |

Table S10. Feature importance for discriminating various land cover types based on the S1+ dataset.

|                                | Mangrove | Mixed<br>swamp | Palm<br>swamp | Bog plain | Natural<br>forest | Sparse<br>vegetation | Coconut | Rubber  | Oil palm | Built-up | Bare<br>surface | Water   |
|--------------------------------|----------|----------------|---------------|-----------|-------------------|----------------------|---------|---------|----------|----------|-----------------|---------|
| <b>VH</b>                      | 0.2478a  | 0.2495a        | 0.2145a       | 0.1032a   | 0.2374a           | 0.2174a              | 0.2273a | 0.2279a | 0.1998a  | 0.1949c  | 0.0449          | 0.0991b |
| <b>VV</b>                      | 0.1963b  | 0.1866b        | 0.1730b       | 0.0307b   | 0.1705b           | 0.1457b              | 0.1724b | 0.1565b | 0.1637b  | 0.1495e  | 0.0351          | 0.1147a |
| <b>VH stdDev</b>               | 0.1279c  | 0.1431c        | 0.0650c       | 0.0195c   | 0.1426c           | 0.0922c              | 0.0941c | 0.0983c | 0.0587c  | 0.1066   | 0.0480e         | 0.0805c |
| <b>VV stdDev</b>               | 0.0707e  | 0.0644e        | 0.0436e       | 0.0034    | 0.0619            | 0.0319e              | 0.0470e | 0.0380e | 0.0394e  | 0.1035   | 0.0069          | 0.0386e |
| <b>VV variance</b>             | 0.0109   | 0.0046         | 0.0173        | 0.0047    | 0.0556            | 0.0035               | 0.0094  | 0.0084  | 0.0127   | 0.2045b  | 0.0733d         | 0.0179  |
| <b>VV contrast</b>             | 0.0161   | 0.0103         | 0.0232        | 0.0060e   | 0.0802e           | 0.0036               | 0.0126  | 0.0083  | 0.0171   | 0.3046a  | 0.1030c         | 0.0242  |
| <b>VV correlation</b>          | 0.0064   | 0.0001         | 0.0054        | 0.0052    | 0.0081            | 0.0074               | 0.0054  | 0.0170  | 0.0039   | 0.0047   | 0.0115          | 0.0086  |
| <b>VH variance</b>             | 0.0027   | 0.0018         | 0.0178        | 0.0003    | 0.0369            | 0.0120               | 0.0114  | 0.0001  | 0.0149   | 0.1036   | 0.1431b         | 0.0122  |
| <b>VH contrast</b>             | 0.0030   | 0.0011         | 0.0270        | 0.0032    | 0.0547            | 0.0188               | 0.0179  | 0.0042  | 0.0228   | 0.1618d  | 0.1981a         | 0.0168  |
| <b>VH correlation</b>          | 0.0064   | 0.0018         | 0.0027        | 0.0135d   | 0.0100            | 0.0093               | 0.0061  | 0.0192  | 0.0047   | 0.0065   | 0.0224          | 0.0085  |
| <b>VV<sub>Δ</sub>amplitude</b> | 0.0697   | 0.0624         | 0.0436        | 0.0044    | 0.0592            | 0.0314               | 0.0467  | 0.0378  | 0.0390   | 0.0949   | 0.0123          | 0.0362  |
| <b>VH<sub>Δ</sub>amplitude</b> | 0.1062d  | 0.1173d        | 0.0545d       | 0.0034    | 0.1144d           | 0.0783d              | 0.0780d | 0.0811d | 0.0488d  | 0.0772   | 0.0405          | 0.0656d |

Table S11. Feature importance for discriminating various land cover types based on the S2+S1+ dataset.

|                | Mangrove | Mixed<br>swamp | Palm<br>swamp | Bog plain | Natural<br>forest | Sparse<br>vegetation | Coconut | Rubber  | Oil palm | Built-up | Bare<br>surface | Water   |
|----------------|----------|----------------|---------------|-----------|-------------------|----------------------|---------|---------|----------|----------|-----------------|---------|
| Blue           | 0.0016   | 0.0009         | 0.0074        | 0.0377    | 0.0146            | 0.0065               | 0.0036  | 0.0036  | 0.0069   | 0.1434   | 0.1100          | 0.0072  |
| Green          | 0.0218   | 0.0235         | 0.0437e       | 0.0650d   | 0.0014            | 0.0413               | 0.0203  | 0.0137  | 0.0247   | 0.1758e  | 0.1799e         | 0.0067  |
| Red            | 0.0118   | 0.0169         | 0.0332        | 0.1369a   | 0.0113            | 0.0432               | 0.0146  | 0.0077  | 0.0179   | 0.3518a  | 0.5289a         | 0.0415d |
| Red Edge 1     | 0.0216   | 0.0200         | 0.0325        | 0.0492    | 0.0118            | 0.0351               | 0.0195  | 0.0158  | 0.0231   | 0.0857   | 0.1412          | 0.0018  |
| Red Edge 2     | 0.0108   | 0.0097         | 0.0144        | 0.0094    | 0.0128            | 0.0175               | 0.0129  | 0.0148  | 0.0158   | 0.0100   | 0.0230          | 0.0101  |
| Red Edge 3     | 0.0044   | 0.0043         | 0.0060        | 0.0035    | 0.0064            | 0.0078               | 0.0060  | 0.0070  | 0.0075   | 0.0033   | 0.0082          | 0.0047  |
| NIR            | 0.0085   | 0.0085         | 0.0117        | 0.0071    | 0.0128            | 0.0155               | 0.0118  | 0.0135  | 0.0145   | 0.0063   | 0.0140          | 0.0096  |
| Red Edge 4     | 0.0058   | 0.0059         | 0.0079        | 0.0050    | 0.0085            | 0.0103               | 0.0080  | 0.0091  | 0.0098   | 0.0043   | 0.0085          | 0.0066  |
| SWIR1          | 0.0095   | 0.0189         | 0.0362        | 0.0598e   | 0.0279            | 0.0553e              | 0.0260  | 0.0408  | 0.0348   | 0.0923   | 0.1376          | 0.0296  |
| SWIR2          | 0.0024   | 0.0157         | 0.0305        | 0.0902c   | 0.0207            | 0.0595d              | 0.0191  | 0.0344  | 0.0269   | 0.2119c  | 0.2249b         | 0.0277  |
| NDVI           | 0.0620c  | 0.0606c        | 0.0639c       | 0.0319    | 0.0756c           | 0.0685c              | 0.0679b | 0.0730c | 0.0727c  | 0.0061   | 0.0031          | 0.0556a |
| NDVI stdDev    | 0.0349   | 0.0009         | 0.0029        | 0.0119    | 0.0016            | 0.0087               | 0.0019  | 0.0000  | 0.0016   | 0.0232   | 0.0683          | 0.0069  |
| VH             | 0.1102   | 0.1108a        | 0.0954a       | 0.0457    | 0.1056a           | 0.0964a              | 0.1009a | 0.1014a | 0.0887a  | 0.0866   | 0.0225          | 0.0441c |
| VV             | 0.0645a  | 0.0614         | 0.0571d       | 0.0102    | 0.0562            | 0.0479               | 0.0567d | 0.0517d | 0.0541d  | 0.0491   | 0.0122          | 0.0377  |
| VH stdDev      | 0.0613b  | 0.0692b        | 0.0317        | 0.0093    | 0.0694d           | 0.0456               | 0.0454e | 0.0480e | 0.0282   | 0.0515   | 0.0210          | 0.0391e |
| VV stdDev      | 0.0362   | 0.0335         | 0.0228        | 0.0016    | 0.0324            | 0.0176               | 0.0247  | 0.0200  | 0.0205   | 0.0552   | 0.0033          | 0.0201  |
| NDWI           | 0.0612d  | 0.0605d        | 0.0642b       | 0.0468    | 0.0766b           | 0.0728b              | 0.0697c | 0.0756b | 0.0753b  | 0.0207   | 0.0430          | 0.0478b |
| EVI            | 0.0237   | 0.0232         | 0.0311        | 0.0089    | 0.0379            | 0.0410               | 0.0330  | 0.0385  | 0.0405   | 0.0120   | 0.0049          | 0.0313  |
| MSAVI2         | 0.0251   | 0.0244         | 0.0314        | 0.0082    | 0.0395            | 0.0403               | 0.0338  | 0.0394  | 0.0409e  | 0.0131   | 0.0081          | 0.0317  |
| LSWI           | 0.0318   | 0.0072         | 0.0097        | 0.1260b   | 0.0178            | 0.0210               | 0.0129  | 0.0041  | 0.0164   | 0.2432b  | 0.2033c         | 0.0337  |
| ARVI           | 0.0000   | 0.0000         | 0.0000        | 0.0000    | 0.0000            | 0.0000               | 0.0000  | 0.0000  | 0.0000   | 0.0000   | 0.0000          | 0.0000  |
| NBR            | 0.0327   | 0.0210         | 0.0171        | 0.0564    | 0.0276            | 0.0060               | 0.0252  | 0.0196  | 0.0275   | 0.1903d  | 0.1088          | 0.0074  |
| NBR2           | 0.0267   | 0.0232         | 0.0273        | 0.0125    | 0.0279            | 0.0245               | 0.0280  | 0.0284  | 0.0292   | 0.0107   | 0.0193          | 0.0162  |
| VV variance    | 0.0008   | 0.0009         | 0.0037        | 0.0009    | 0.0118            | 0.0006               | 0.0020  | 0.0016  | 0.0030   | 0.0427   | 0.0162          | 0.0038  |
| VV contrast    | 0.0016   | 0.0023         | 0.0054        | 0.0012    | 0.0186            | 0.0006               | 0.0029  | 0.0017  | 0.0044   | 0.0695   | 0.0252          | 0.0056  |
| VV correlation | 0.0003   | 0.0000         | 0.0004        | 0.0004    | 0.0006            | 0.0006               | 0.0004  | 0.0013  | 0.0002   | 0.0004   | 0.0009          | 0.0006  |
| VH variance    | 0.0005   | 0.0004         | 0.0041        | 0.0000    | 0.0086            | 0.0027               | 0.0026  | 0.0002  | 0.0036   | 0.0234   | 0.0350          | 0.0028  |

[illegible]
